# Supplementary material
Source: PubMed Central journal article supplement (PMC4312267)

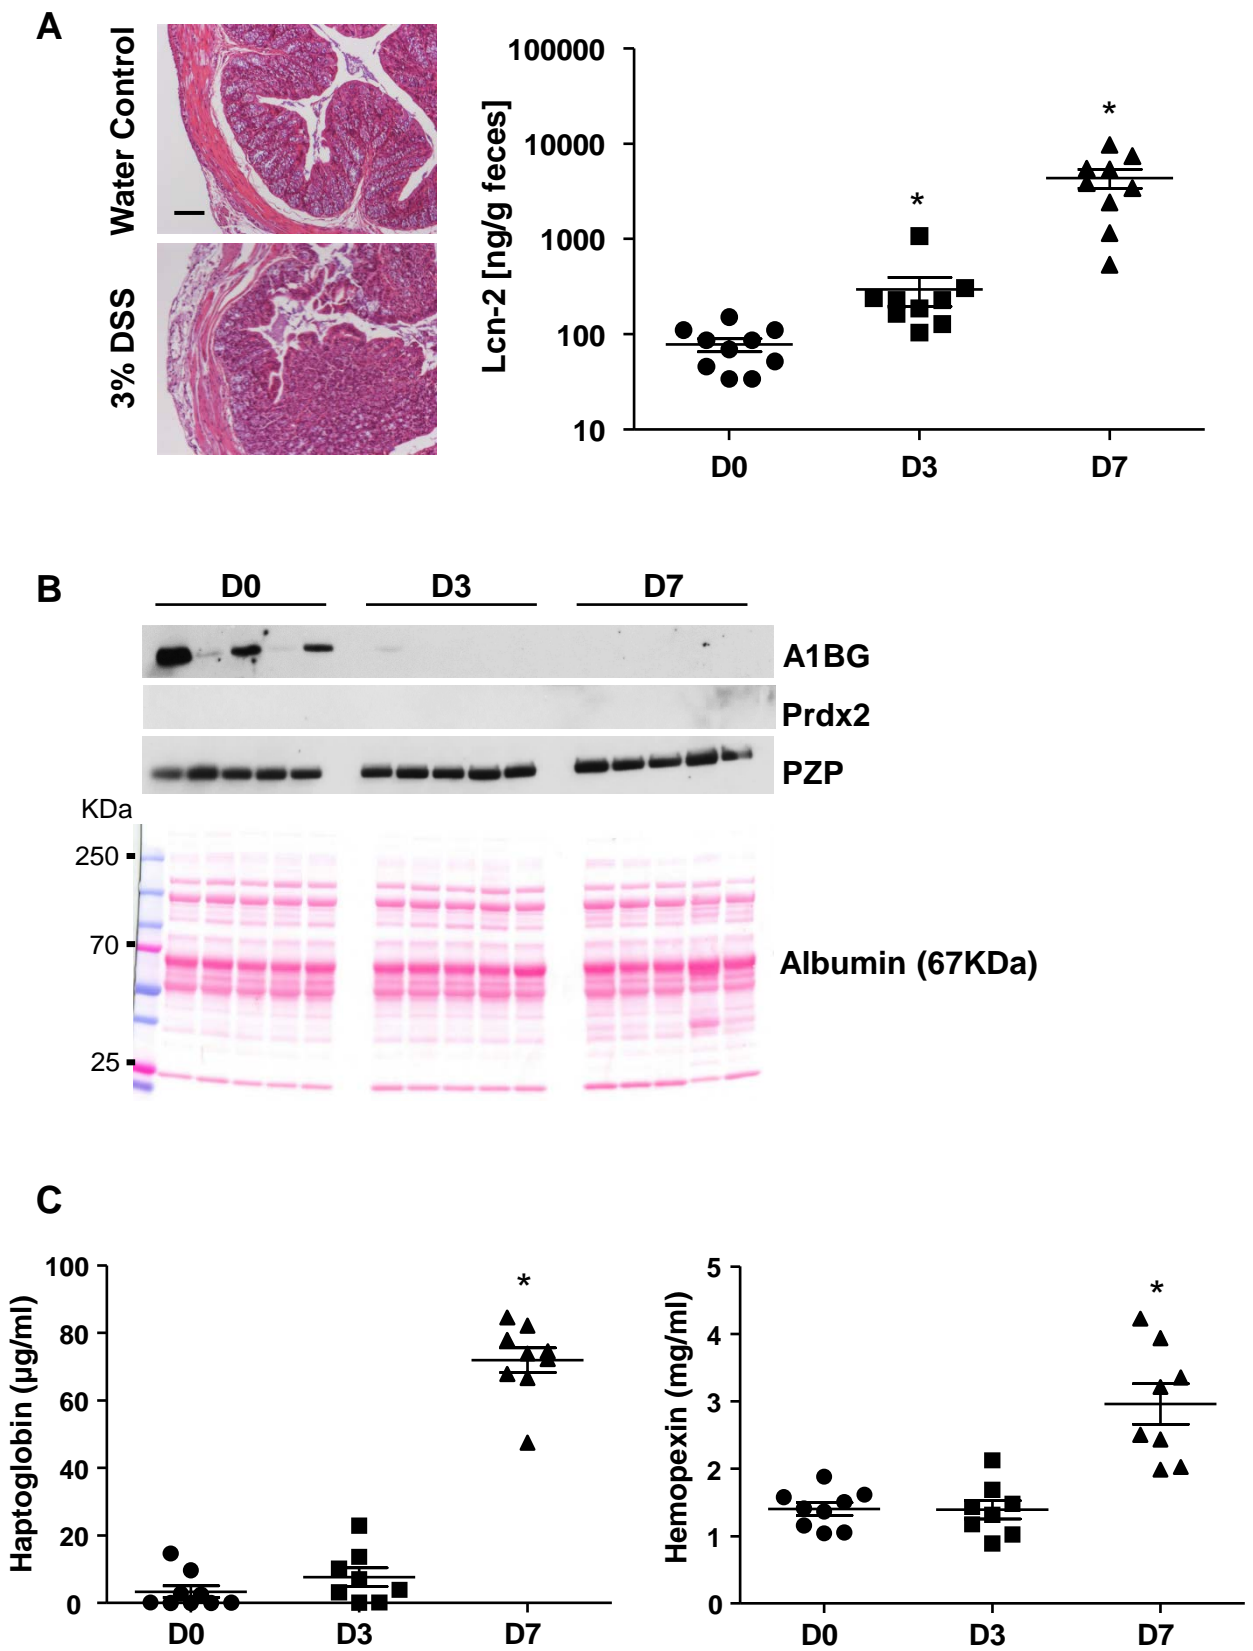

Figure S1, Viennois *et al.*

Supplement: NIHMS631421-supplement-2.pdf [file NIHMS631421-supplement-2.pdf]

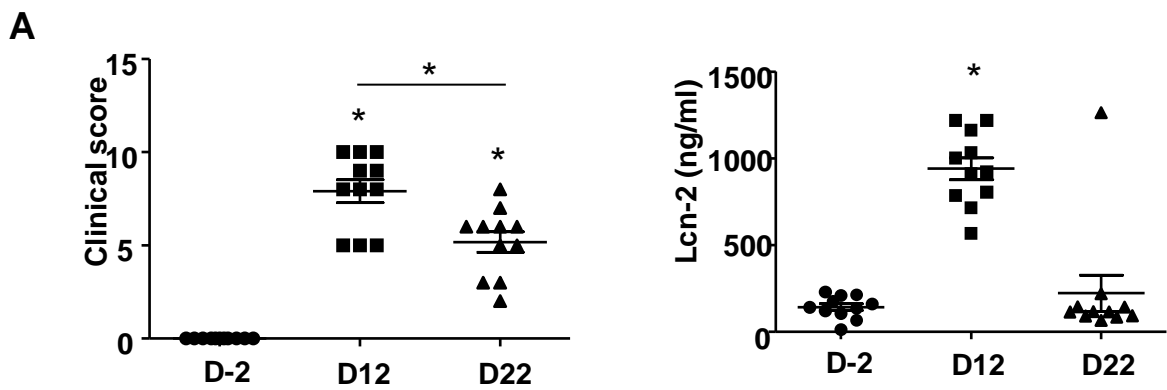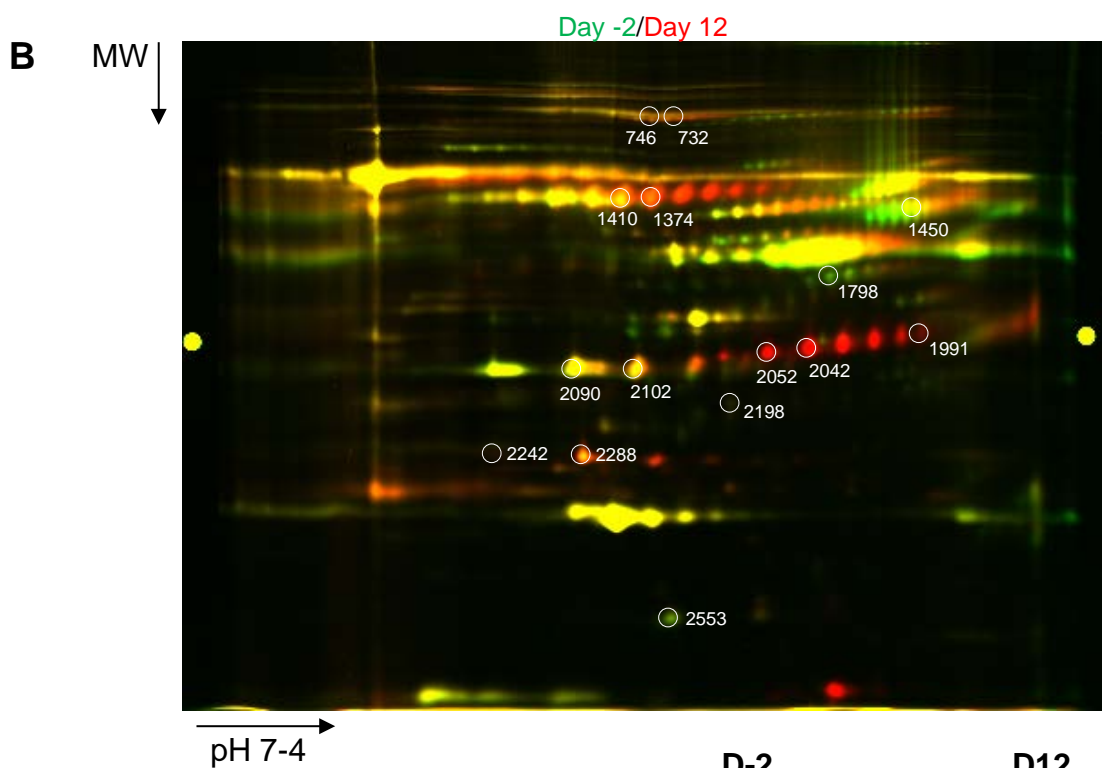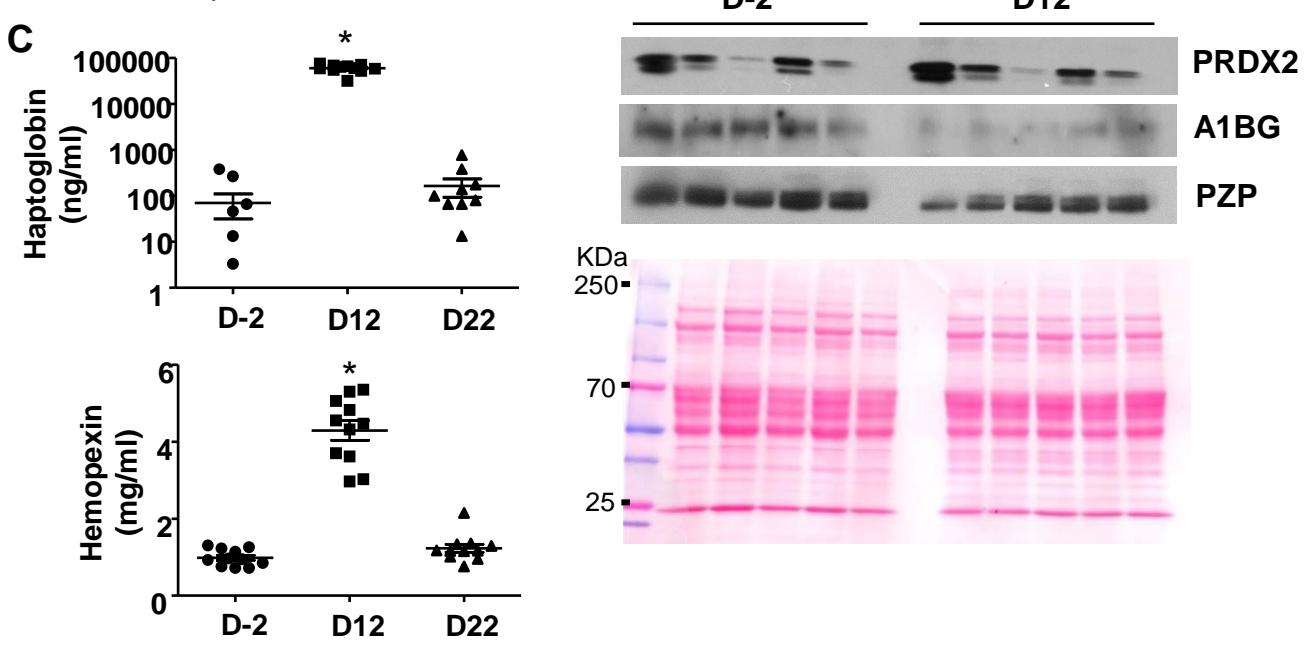

Figure S2, Viennois *et al.*

Supplement: NIHMS631421-supplement-3.pdf [file NIHMS631421-supplement-3.pdf]

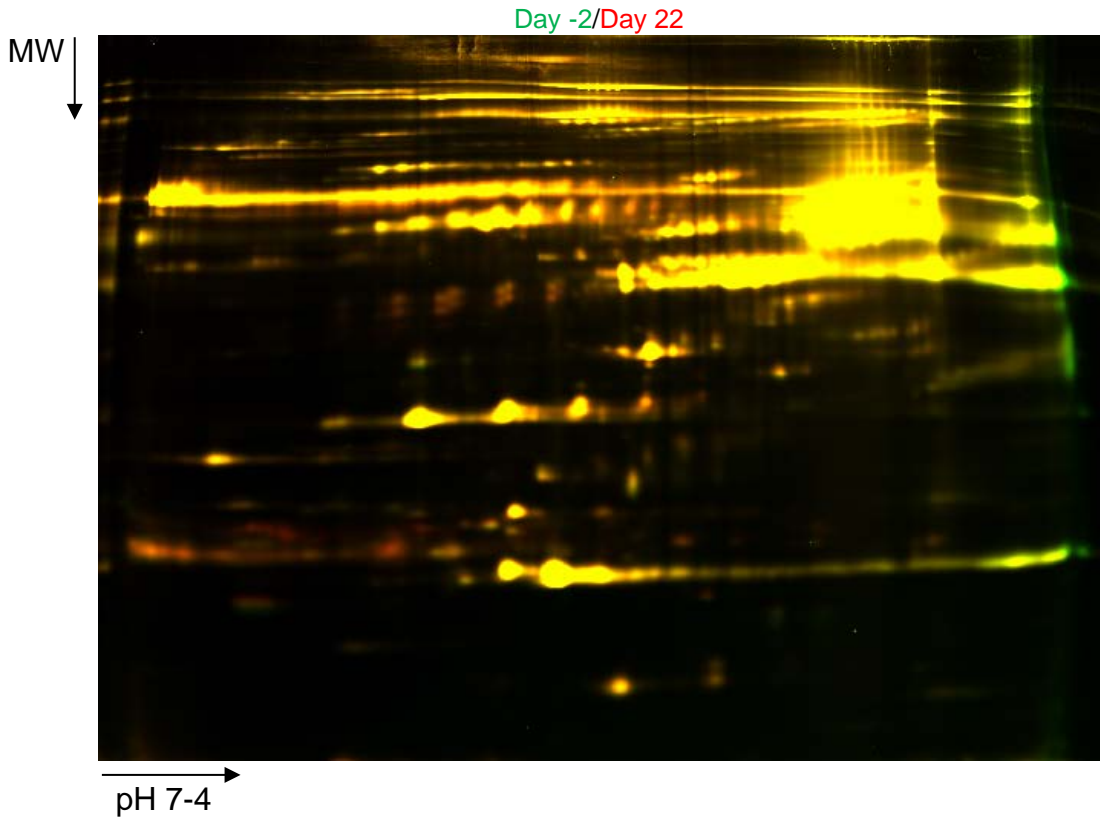

Figure S3, Viennois *et al.*

Supplement: NIHMS631421-supplement-4.pdf [file NIHMS631421-supplement-4.pdf]

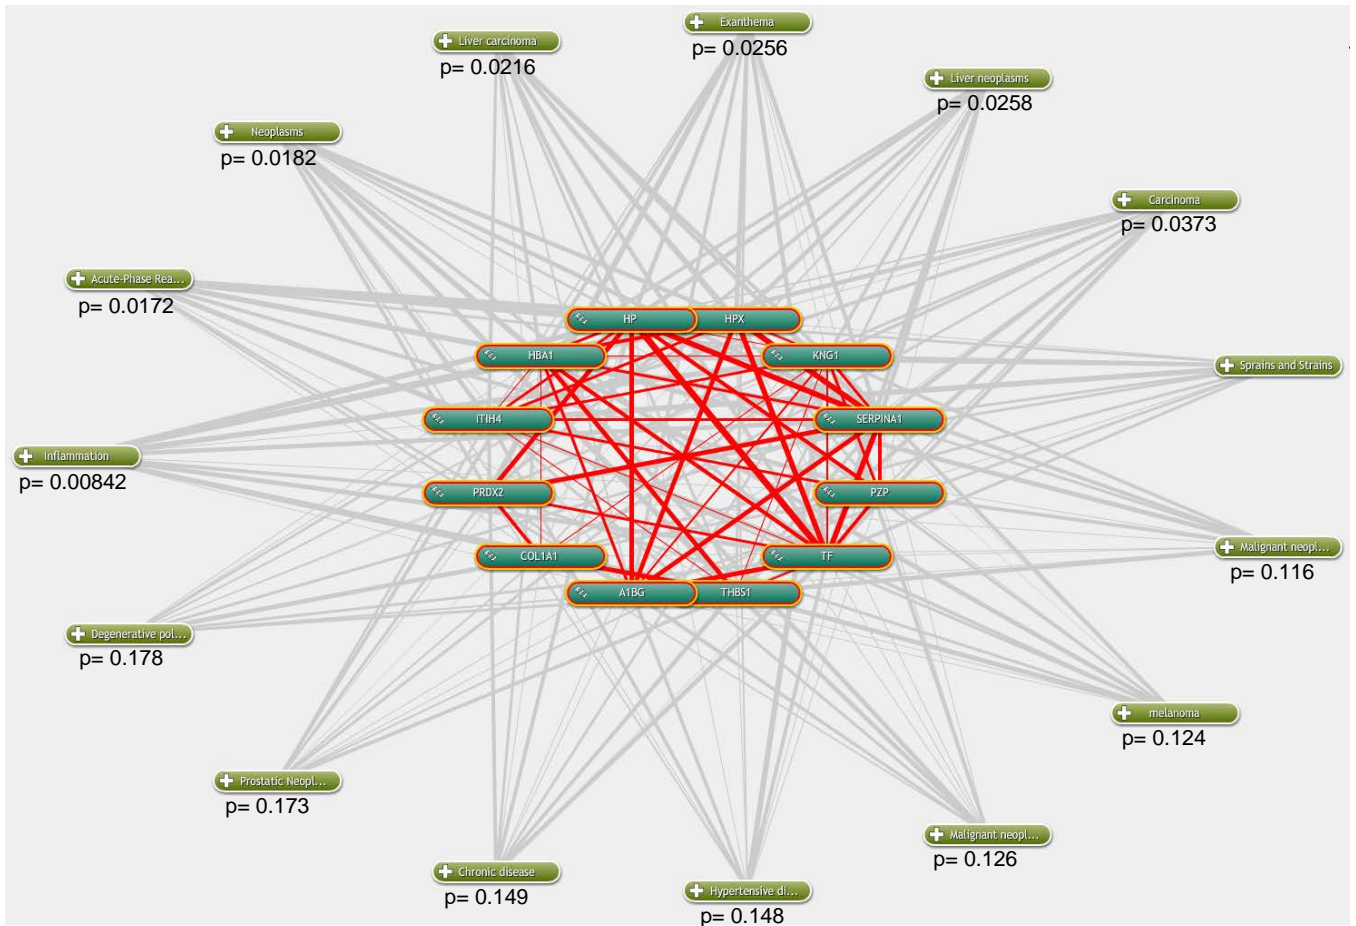

Supplement: NIHMS631421-supplement-7.pdf [file NIHMS631421-supplement-7.pdf]
